# Supplementary material
Source: PubMed Central journal article supplement (PMC4865916)
Supplement: 10.1074_M116.720698_jbc.M116.720698-5.pdf [file 10.1074_M116.720698_jbc.M116.720698-5.pdf]

## **Supplementary figures and tables.**

**Figure S1.** Strategy to identify and validate the EGR1 target genes in GSG. Flow chart showing the steps followed from the DNA libraries preparation to the selection of potential EGR1 target genes and their validations by functional approaches.

**Figure S2.** Visualization of ChIP-sequencing data in USCS genome browser  
Screen shot showing for 4 genes, the locations of EGR1 peak and the primers used in ChIP-qPCR assays. The last panel shows the promoter of mir17-92 containing 3 putative EGR1 sites. Three couple of primers noted P1, P2 and P3, were used to assess the EGR1 binding on each putative EGR1 sites by ChIP-qPCR assays.

**Table S1.** Primer sequences used for ChIP- qPCR analysis.

**Table S2.** Wild type and mutated probe sequences used for EMSA analysis.
